# Supplementary material for: Lithium ion as growth-controlling agent of ZnO nanoparticles prepared by organometallic synthesis
Source: Royal Society of Chemistry journal article supplement (doi:10.1039/b715583b), 2008-01-01
Supplement: b715583b.pdf [file b715583b.pdf]

SUPPLEMENTARY INFORMATION

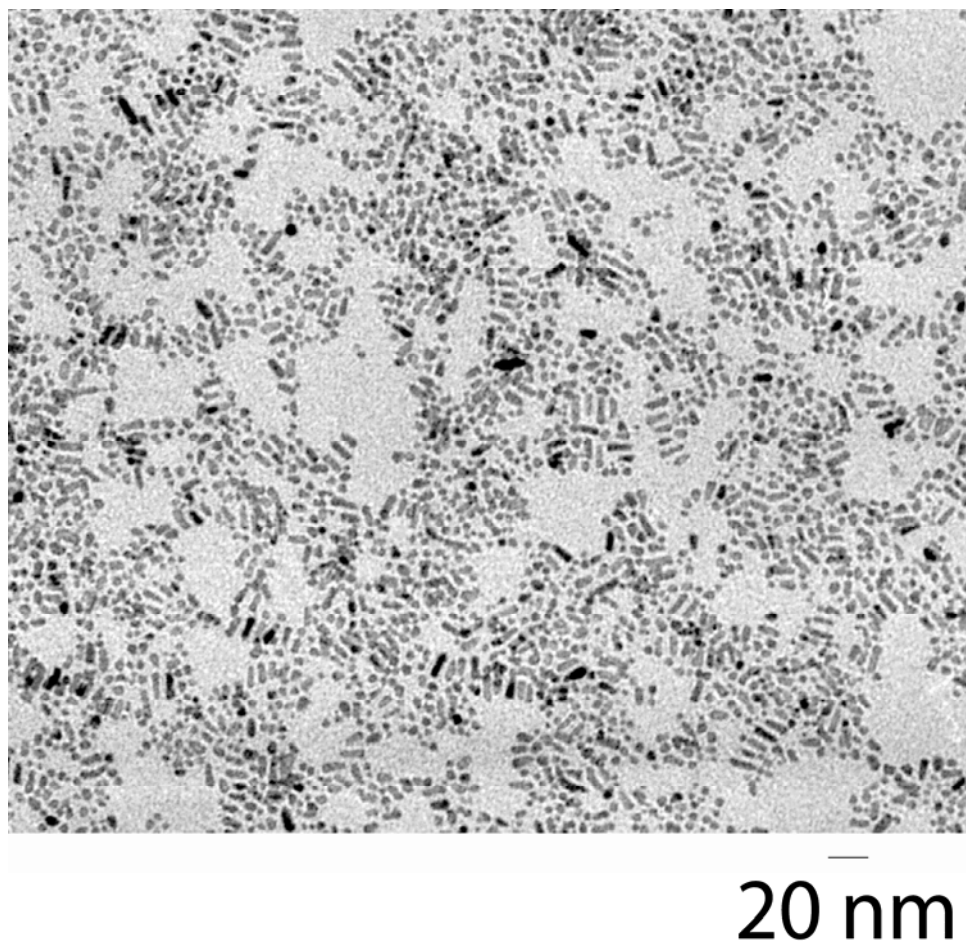

**Figure S 1:** TEM pictures of ZnO nanorods obtained in absence of Li or Na ion.

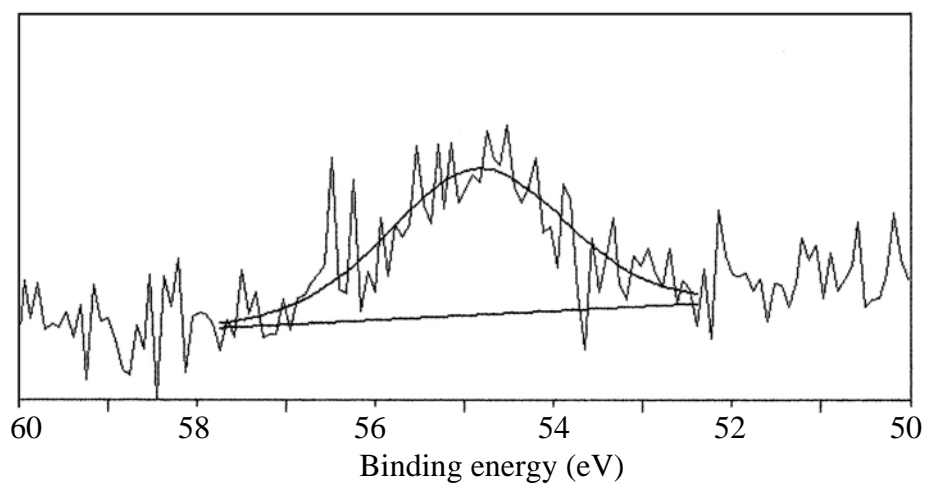

**Figure S 2:** XPS measurement on ZnO nanoparticles prepared in presence of 10% of  $[\text{Li}(\text{NMe}_2)_2]$  showing the presence of Li ions after the washing of the sample with deionized water.
